# Supplementary material for: V2O5 nanowires with an intrinsic iodination activity leading to the formation of self-assembled melanin-like biopolymers
Source: Royal Society of Chemistry journal article supplement (doi:10.1039/c1jm11811k), 2011-01-01
Supplement: c1jm11811k.pdf [file c1jm11811k.pdf]

## **V<sub>2</sub>O<sub>5</sub> nanowires with an intrinsic iodination activity leading to the formation of self-assembled melanin-like biopolymers**

**Filipe Natalio<sup>a</sup>, Rute André<sup>a</sup>, Sascha A. Pihan<sup>b</sup>, Madalena Humanes<sup>c</sup>, Ron Wever<sup>d</sup>, Wolfgang Tremel<sup>a†</sup>**

### **Supplementary Information**

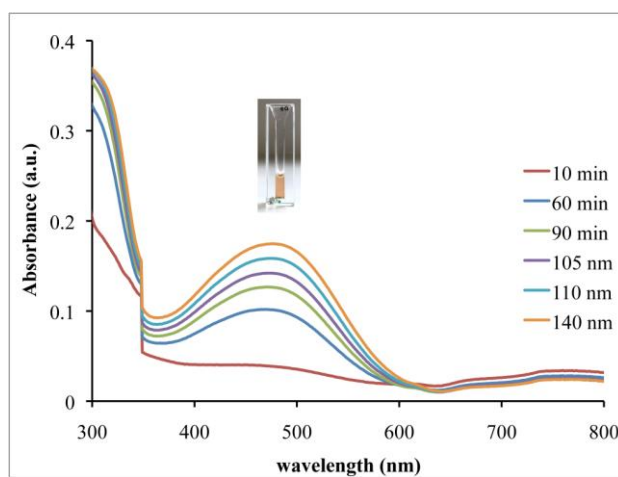

**Figure S1.** Time coursing of bulk V<sub>2</sub>O<sub>5</sub> (1 mg/mL) that was mixed with KI (40 mM) and H<sub>2</sub>O<sub>2</sub> (1 mM) in the presence of dopamine (10 mM). The reaction was carried out in aqueous solution at slightly basic pH values (pH 8.0) and monitored spectrophotometrically for 140 min (RT). *Inset:* digital images of the reaction vial after 140 min of reaction.

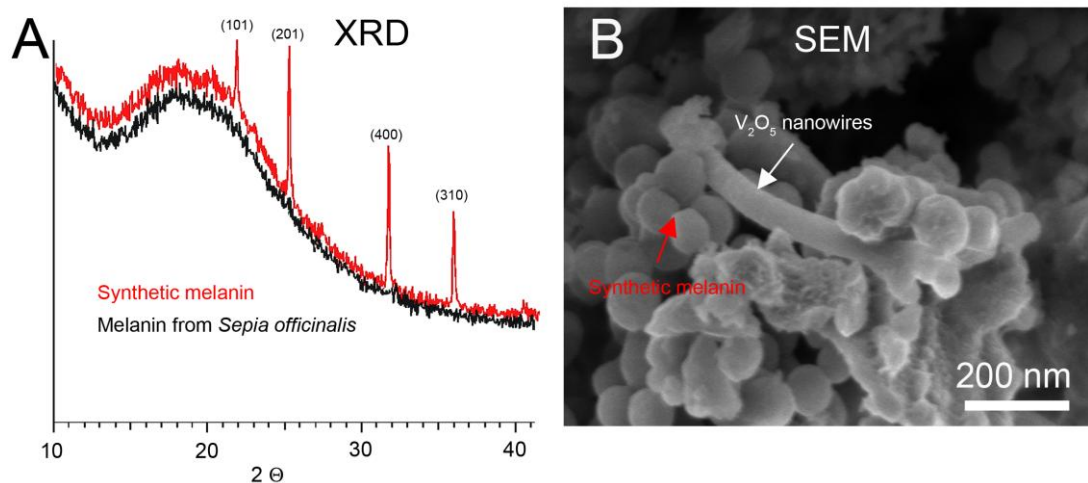

**Figure S2.** (A) XRD pattern of cuttlefish melanin (*Sepia officinalis*) (black line) and the black precipitate (red line) where reflections derived from the  $V_2O_5$  nanowires can be observed. (B) SEM image of the black precipitate containing a  $V_2O_5$  nanowire.
